# Supplementary material for: Phosphorylation of NBR1 by GSK3 modulates protein aggregation
Source: PubMed Central journal article supplement — Autophagy. 2014 Mar 31;10(6):1036–53. doi: 10.4161/auto.28479 (PMC4091167; doi:10.4161/auto.28479), 2014-03-31
Supplement: auto-10-1036-s01.pdf [file auto-10-1036-s01.pdf]

## **Supplemental Material to:**

**Anne-Sophie Nicot, Francesca Lo Verso, Francesca Ratti,  
Fanny Pilot-Storck, Nathalie Streichenberger,  
Marco Sandri, Laurent Schaeffer, and Evelyne Goillot**

**Phosphorylation of NBR1 by GSK3 modulates protein  
aggregation**

**Autophagy 2014; 10(6)**

**<http://dx.doi.org/10.4161/auto.28479>**

**[www.landesbioscience.com/journals/autophagy/article/28479](http://www.landesbioscience.com/journals/autophagy/article/28479)**

**A**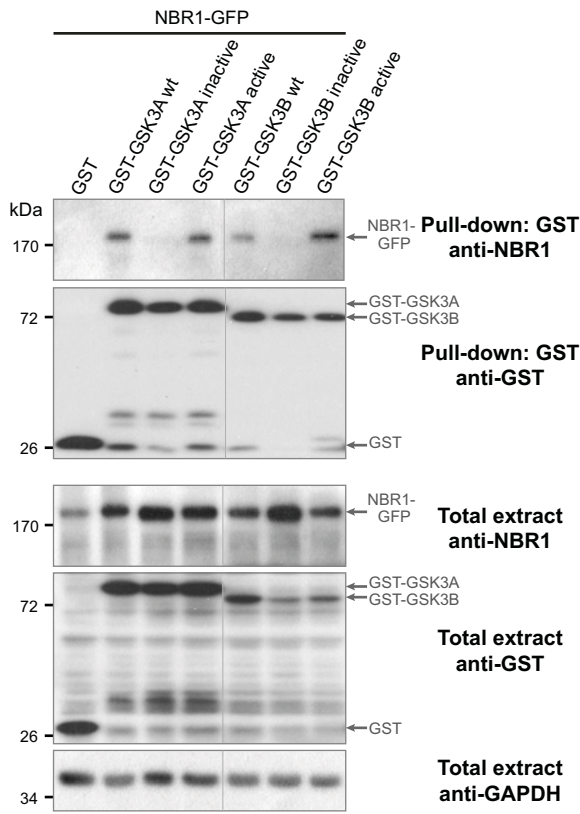**B**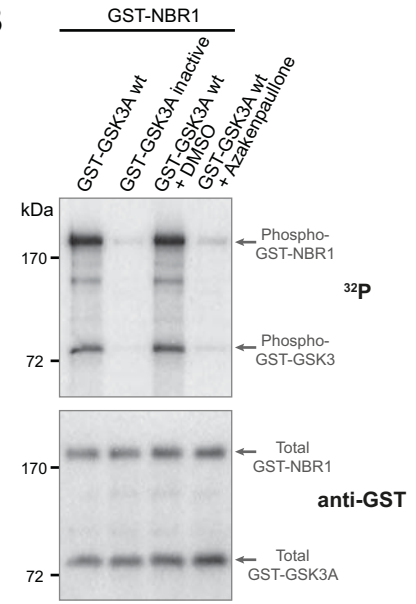**C**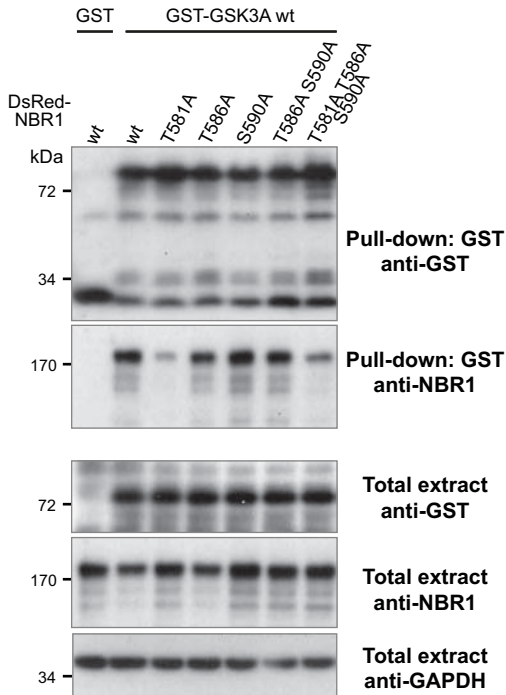**D**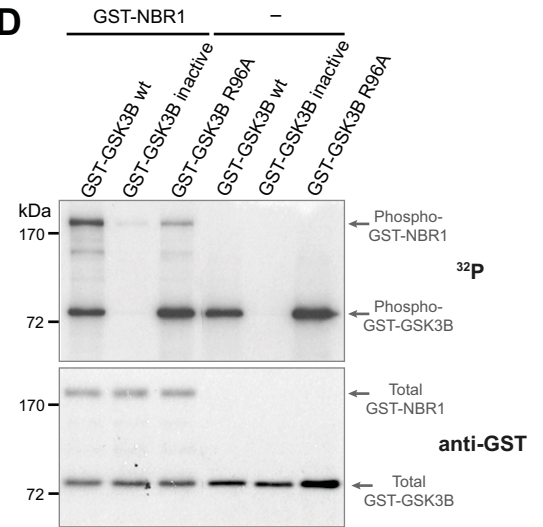**E**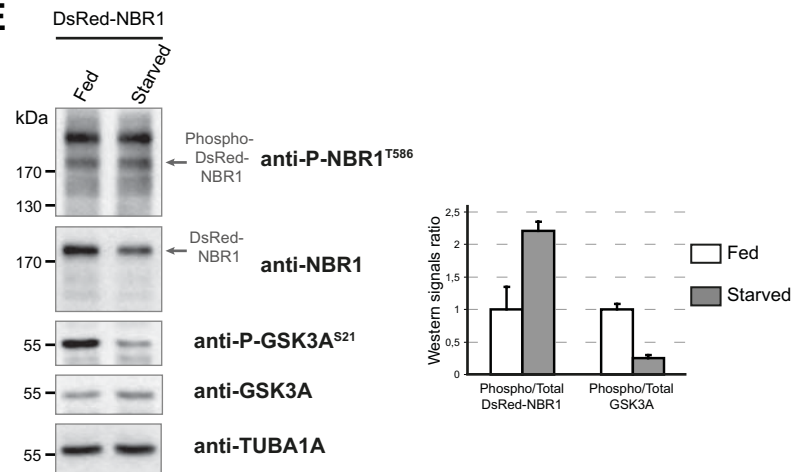

Figure S1

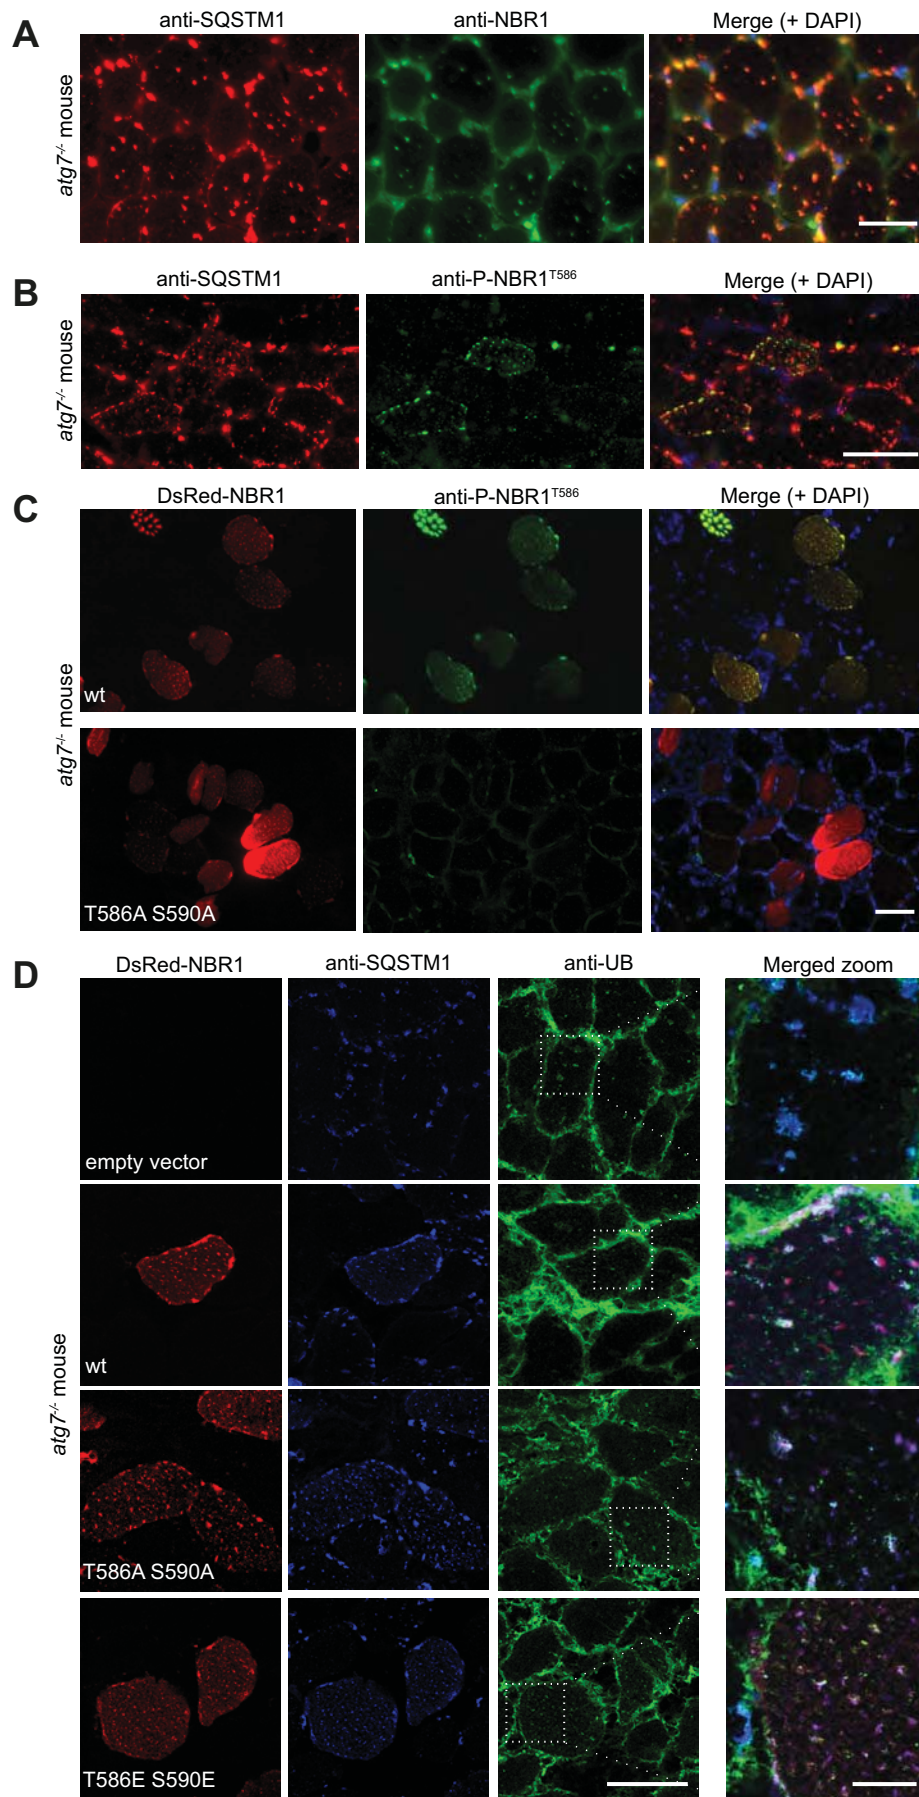

Figure S2

**A**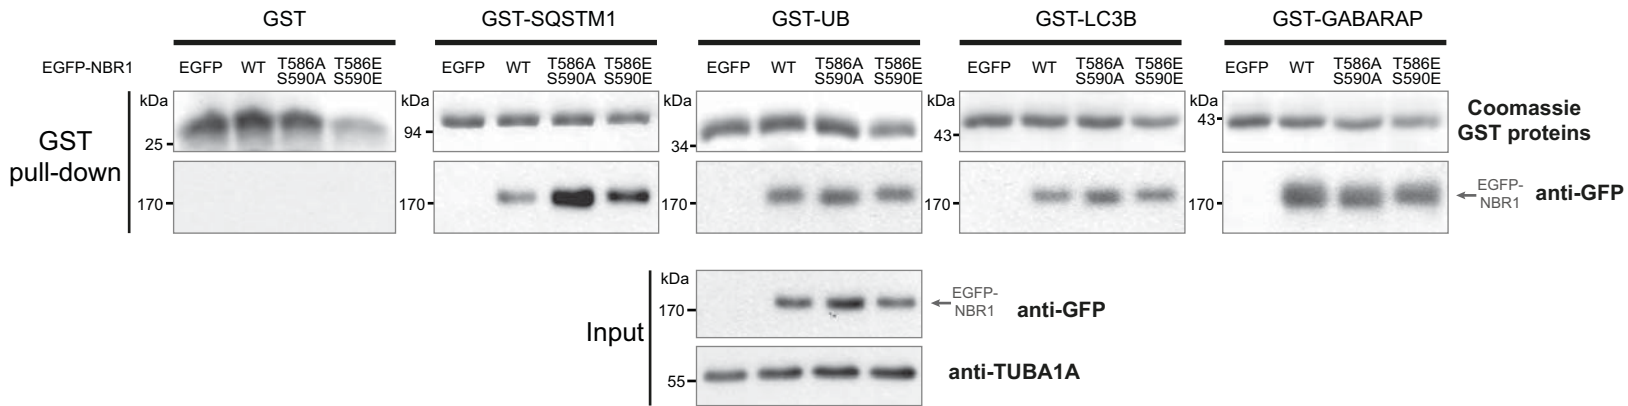**B**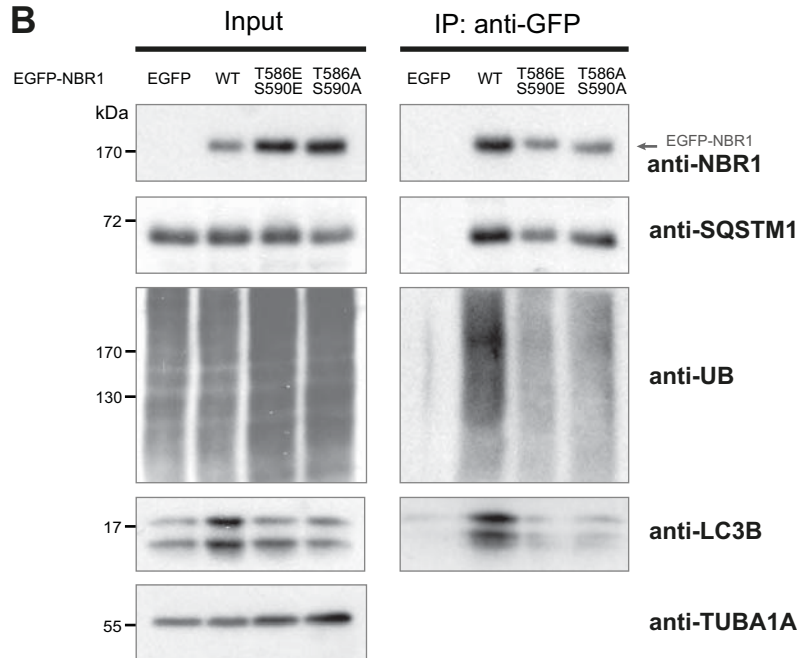

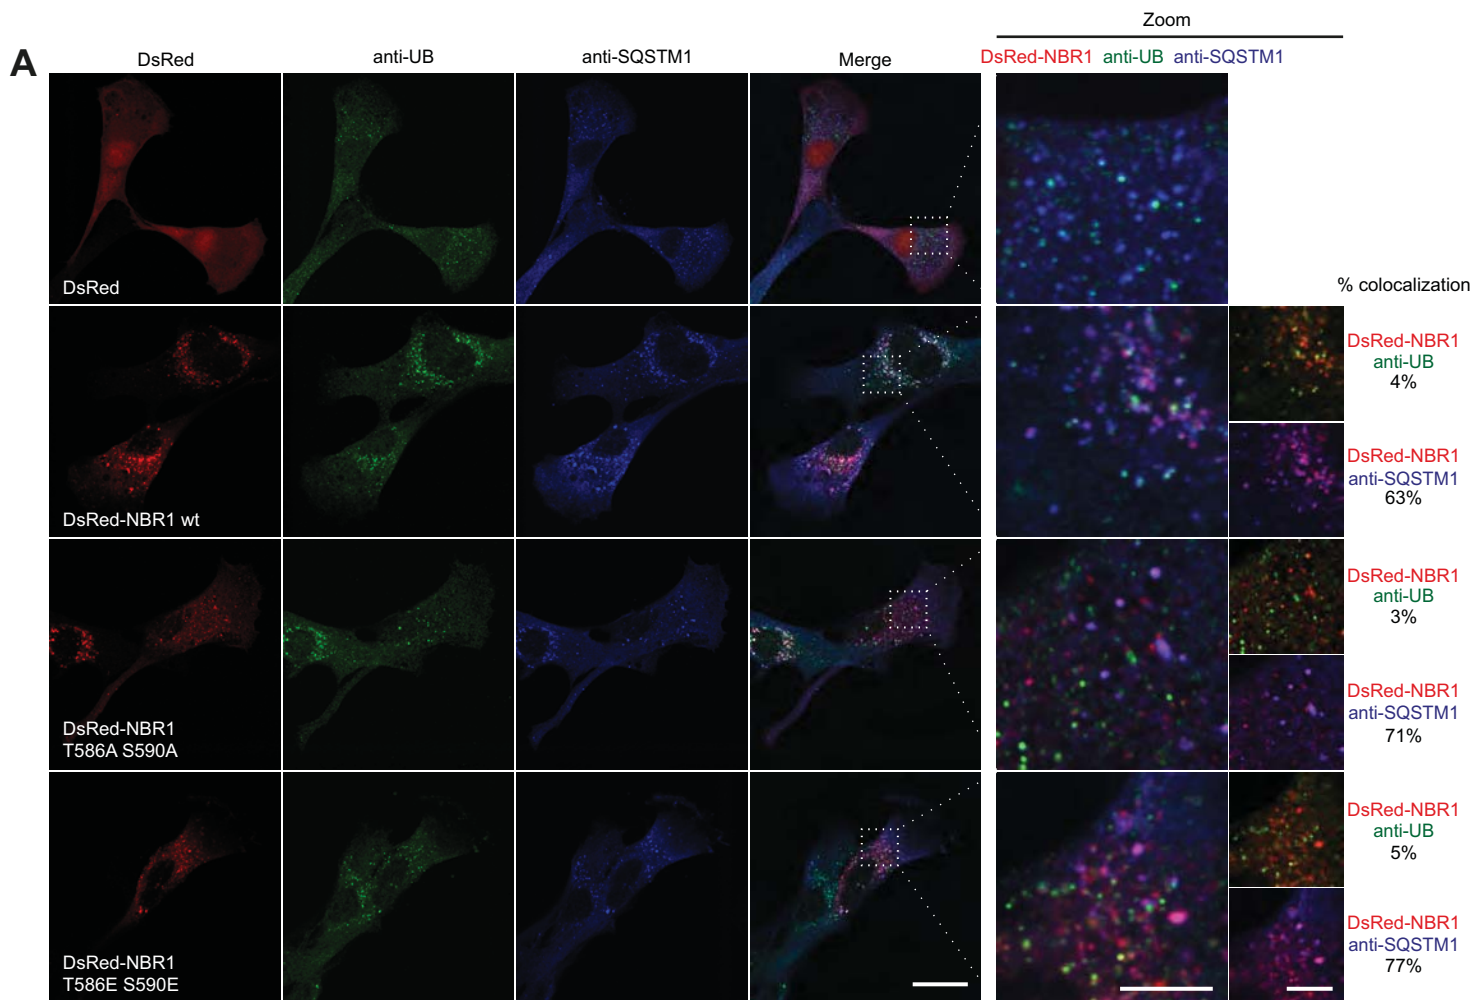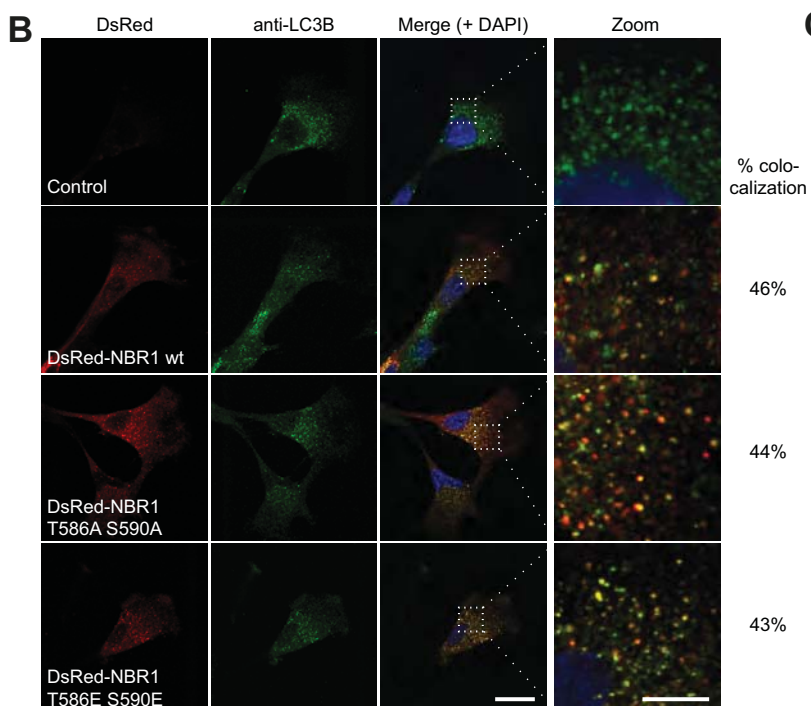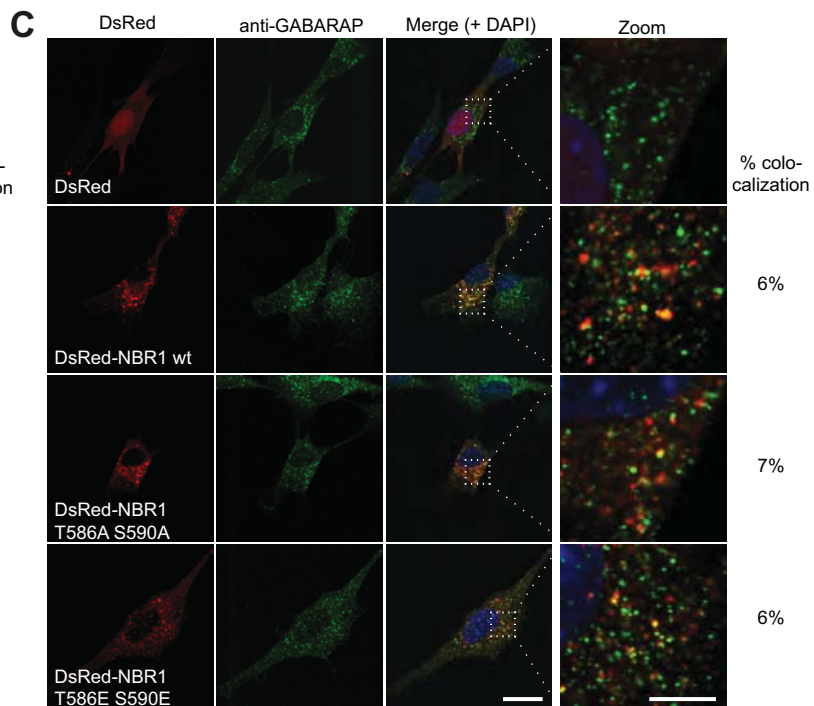

Figure S4

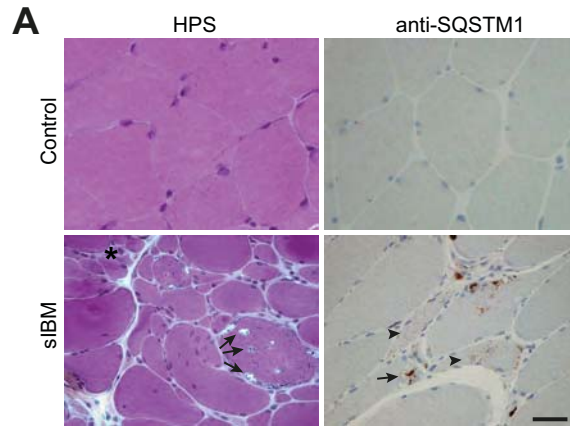

**B**

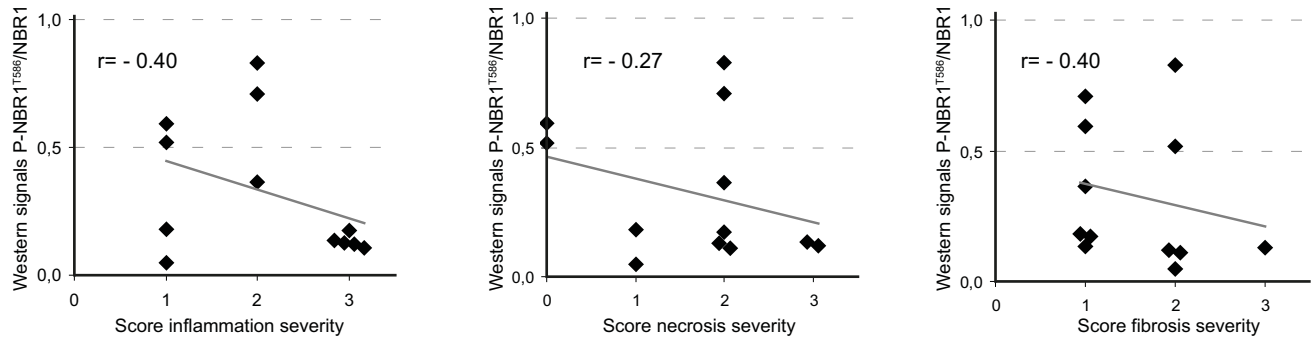

**Figure S1.** NBR1 binds and is a primed substrate of GSK3. **(A)** Co-affinity purification experiments. GST or GST-tagged GSK3A or GSK3B forms (wt, wild-type; inactive, GSK3A K148A or GSK3B K85A; active, GSK3A S21A or GSK3B S9A) were co-expressed with wild-type GFP-tagged NBR1 in 293T cells. GST-GSK3 were purified and used to affinity isolate NBR1-GFP. **(B)** GSK3 *in vitro* kinase assays performed with wild-type or inactive (K148A) GST-GSK3A mixed with wild-type GST-NBR1. The impact of inactive GSK3A on NBR1 phosphorylation was compared with samples incubated with 1-azakenpaullone, an inhibitor of GSK3 activity, or its solvent DMSO. **(C)** Co-affinity experiments performed with wild-type or nonphosphorylatable mutant DsRed-NBR1 affinity isolated by GST or wild-type GST-GSK3A. **(D)** GSK3 *in vitro* kinase assays performed with wild-type GST-GSK3B, inactive (K85A) or R96A mutants mixed with wild-type GST-NBR1. GSK3B R96A is a mutant that cannot phosphorylate primed substrates. **(E)** Western blot showing the level of DsRed-NBR1 phosphorylated on Thr586 and endogenous Ser21-phosphorylated GSK3A in C2C12 myoblasts fed or starved for 2 h. Right panel: ratio of band intensities of phospho- to total DsRed-NBR1, endogenous GSK3A normalized to 1 for the fed condition. Error bars represent standard deviations (n=2).

**Figure S2.** Total NBR1, SQSTM1 and UB are contained in protein aggregates of *Atg7* muscle-specific knockout mice whereas phospho-NBR1<sup>T586</sup> is present only in rare fibers with small aggregates. **(A)** Microscopy pictures of muscle transverse sections of *Atg7* muscle-specific knockout mice immunostained for endogenous NBR1 (green) and SQSTM1 (red). Nuclei were stained with DAPI (blue in Merge). Protein aggregates are positive for SQSTM1 and NBR1. Scale bar: 50  $\mu$ m. **(B)** Muscle transverse sections of *Atg7* muscle-specific knockout mice immunostained for endogenous phospho-NBR1<sup>T586</sup> (green) and SQSTM1 (red). Nuclei were stained with DAPI (blue in Merge). Phospho-NBR1<sup>T586</sup> is visible only within fibers containing small SQSTM1-positive aggregates. Scale bar: 50  $\mu$ m. **(C)** Muscle transverse sections of *Atg7* muscle-specific knockout mice electroporated with wild-type or nonphosphorylatable DsRed-NBR1

T586A S590A double mutant (red) immunostained for phospho-NBR1<sup>T586</sup> (green). Nuclei were stained with DAPI (blue in Merge). Anti-phospho-NBR1<sup>T586</sup> antibody binds wild-type DsRed-NBR1 but not the nonphosphorylatable T586A S590A double mutant. Scale bar: 50  $\mu$ m. (D) Muscle transverse sections of *Atg7* muscle-specific knockout mice electroporated with wild-type DsRed-NBR1 or nonphosphorylatable T586A S590A or phosphosphomimetic T586E S590E DsRed-NBR1 double mutant (red) immunostained for SQSTM1 (blue) and UB (FK2 antibody, green). Aggregates and speckles are positive for NBR1, SQSTM1 and UB. Scale bar: 50  $\mu$ m in left panels, 10  $\mu$ m in merged zoom.

**Figure S3.** NBR1 phosphorylation does not modify its physical capacity to interact with autophagy partners LC3B, GABARAP and ubiquitinated proteins, and slightly decreases interaction with SQSTM1. (A) GST affinity isolation experiments showing NBR1 interaction with SQSTM1, UB, LC3B or GABARAP. GST-SQSTM1, GST-UB, GST-LC3B or GST-GABARAP were transfected in 293T cells and purified with glutathione beads. Beads were used to affinity isolate EGFP, wild-type EGFP-NBR1, EGFP-NBR1 T586A S590A or EGFP-NBR1 T586E S590E expressed in 293T cells. Inputs and GST affinity isolated products were analyzed by western blot for NBR1 interaction with anti-GFP antibodies and quantities of GST proteins on beads were verified on Coomassie-stained gels. (B) EGFP or EGFP-NBR1 forms (wt, wild-type; T586E S590E, phosphomimetic; T586A S590A, nonphosphorylatable) were immunoprecipitated from C2C12 myoblasts with anti-GFP antibody. Coimmunoprecipitations of endogenous SQSTM1, ubiquitinated proteins and LC3B were verified. Quantities of coimmunoprecipitated ubiquitinated proteins and LC3B correlate with the levels of EGFP-NBR1 forms present on beads. A slightly higher amount of SQSTM1 was coimmunoprecipitated with EGFP-NBR1 T586A S590A as compared to EGFP-NBR1 T586E S590E.



**Figure S4.** NBR1 phosphorylation does not modify its colocalizations with SQSTM1, UB, LC3B and GABARAP. Confocal microscopy pictures of C2C12 myoblasts transfected with DsRed empty plasmid, wild-type DsRed-NBR1, DsRed-NBR1 nonphosphorylatable (T586A S590A) or phosphomimetic (T586E S590E) mutants. Cells were immunostained for endogenous UB and SQSTM1 (**A**), LC3B (**B**) or GABARAP (**C**). In (**B**), diffuse control DsRed was lost by the methanol immunostaining procedure. The percentage of dots positive for both proteins tested is depicted on the right of the enlargements. Scale bars: 20  $\mu\text{m}$  in left panels, 5  $\mu\text{m}$  in zoom.

**Figure S5.** No correlation exists between the level of phospho-NBR1<sup>T586</sup> and the severity of inflammation, necrosis or fibrosis in muscles of sIBM patients. (**A**) Left pictures: Haemalum phloxin saffron (HPS)-stained frozen sections of muscle biopsies from control and sIBM patients. sIBM patient muscle displays atrophied fibers, necrotic fibers (star), fibrosis (pale pink in intercellular space) and numerous rimmed vacuoles (arrows) in muscle fibers. Right pictures: immunostaining of frozen muscle sections with anti-SQSTM1 antibody. sIBM muscle shows SQSTM1-positive aggregates in a rimmed vacuole (arrow) and in the cytoplasm (arrowheads) within muscle fiber. Scale bar: 20  $\mu\text{m}$ . (**B**) Anti-P-NBR1<sup>T586</sup>/anti-NBR1 signals of each sIBM patient determined by western blot in Figure 5 represented as a function of severity scores for different muscular symptoms: inflammation, necrosis, fibrosis (cf **Table S1**). In gray is the trend line.  $r =$  Spearman rho correlation coefficient.  $p > 0.05$ : there is no significant association between the level of phospho-NBR1<sup>T586</sup> and the severity of inflammation, necrosis or fibrosis in sIBM muscles.

**Table S1.** Clinical data and severity scores of sIBM patients

| Patients | Sexe   | Age<br>(years) | Muscle<br>weakness     | Onset of<br>symptoms | Muscle biopsy             | CPK<br>( $\mu\text{g/L}$ ) | Severity scores        |              |          |          | Western:<br>signal ratio<br>P-NBR1 <sup>T586</sup> /NBR1 |
|----------|--------|----------------|------------------------|----------------------|---------------------------|----------------------------|------------------------|--------------|----------|----------|----------------------------------------------------------|
|          |        |                |                        |                      |                           |                            | Protein<br>aggregation | Inflammation | Necrosis | Fibrosis |                                                          |
| IBM 1    | Male   | 60             | Lower limbs            | 3 years              | Left quadriceps           | 1000                       | 3                      | 3            | 2        | 3        | 0.128                                                    |
| IBM 2    | Male   | 46             | Lower limbs            | 2 years              | Right quadriceps          | 800                        | 2                      | 1            | 0        | 1        | 0.593                                                    |
| IBM 3    | Male   | 67             | Lower limbs            | Several<br>years     | Right quadriceps          | 1300                       | 3                      | 3            | 3        | 2        | 0.120                                                    |
| IBM 4    | Male   | 77             | Lower limbs            | 2 years              | Left quadriceps           | 100                        | 3                      | 1            | 1        | 2        | 0.050                                                    |
| IBM 5    | Male   | 52             | Lower limbs            | 5 years              | Left quadriceps           | ?                          | 1                      | 1            | 0        | 2        | 0.518                                                    |
| IBM 6    | Female | 62             | Lower limbs            | 5 years              | Left tibialis<br>anterior | 333                        | 1                      | 1            | 1        | 1        | 0.181                                                    |
| IBM 7    | Male   | 65             | Lower +<br>upper limbs | 4 years              | Left biceps               | 1500                       | 2                      | 2            | 2        | 1        | 0.364                                                    |
| IBM 8    | Female | 64             | Quadriceps             | Progressive<br>onset | Right quadriceps          | 900                        | 2                      | 3            | 2        | 1        | 0.174                                                    |
| IBM 9    | Female | 66             | Lower limbs            | 7 years              | Left quadriceps           | 440                        | 2                      | 2            | 2        | 2        | 1.515 *                                                  |
| IBM 10   | Female | 82             | Lower limbs            | 7 years              | Right quadriceps          | 300                        | 2                      | 3            | 2        | 2        | 0.109                                                    |
| IBM 11   | Male   | 64             | Lower +<br>upper limbs | 3 years              | Left biceps               | 359                        | 0                      | 2            | 2        | 1        | 0.707                                                    |
| IBM 12   | Female | 67             | Quadriceps             | ?                    | ?                         | 1000                       | 2                      | 2            | 2        | 2        | 0.828                                                    |
| IBM 13   | Male   | 60             | Lower limbs            | 2 years              | Right quadriceps          | 540                        | 3                      | 3            | 3        | 1        | 0.134                                                    |

\* Extreme value excluded by Grubbs test at 5%.

CPK = Creatine phosphokinase. Readout of muscle damage (normal value: 10 -120  $\mu\text{g/L}$ )

**Table S2.** Sequences of primers and siRNA oligonucleotides

| Primer name                                                | Forward primer                                      | Reverse primer                                    | Use                                                                                         |
|------------------------------------------------------------|-----------------------------------------------------|---------------------------------------------------|---------------------------------------------------------------------------------------------|
| <i>Cloning</i>                                             |                                                     |                                                   |                                                                                             |
| Hs <i>NBR1</i> -pENTR1A                                    | GCCGCCGGTACCTCACCATGGAACCACAGGTTACTC                | CCGCCGCTCGAGTCTCAATAGCGTTGGCTGTAC                 | Cloning of Hs <i>NBR1</i> into pENTR1A by restriction KpnI/XhoI                             |
| Hs <i>SQSTM1</i> -pENTR1A                                  | GCCGCCGGTACCTCACCATGGCGTCGCTCACCGTG                 | CCGCCGCTCGAGTCTCACAACGGCGGGGGATGC                 | Cloning of Hs <i>SQSTM1</i> into pENTR1A by restriction KpnI/XhoI                           |
| Hs <i>LC3B</i> -pENTR1A                                    | GCCGCCGGTACCTCACCATGCCGTCGGAGAAGACC                 | CCGCCGCTCGAGTCTTACACTGACAATTTTCATCCCG             | Cloning Hs <i>LC3B</i> into pENTR1A by restriction KpnI/XhoI                                |
| Hs <i>UB</i> -pENTR1A                                      | GCCGCCGGTACCTCACCATGCAGATTTTCGTGAAAA<br>CCC         | AATATTGCGGCCGCTCTCAACCACCACGAAGTCTC               | Cloning of Hs <i>UB</i> into pENTR1A by restriction KpnI/NotI                               |
| <i>Mutagenesis</i> (mutated residues are underlined)       |                                                     |                                                   |                                                                                             |
| HsNBR1-T581A                                               | GAGAGTGCCCCACAAC <u>QC</u> ICCTGTGGATGTGACTC        | GAGTCACATCCACAGG <u>AG</u> CGTTGTGGGGCACTCTC      | Mutagenesis of HsNBR1 wt in T581A                                                           |
| HsNBR1-T586A                                               | CCTGTGGATGTG <u>QC</u> TCCCTGCATGTCTCCTC            | GAGGAGACATGCAGGGAG <u>CC</u> CACATCCACAGG         | Mutagenesis of HsNBR1 wt in T586A & T581A in T581A/T586A                                    |
| HsNBR1-S590A                                               | CTCCCTGCATG <u>QC</u> TCTCTGCCACATGACAG             | CTGTCATGTGGCAGAGGAG <u>CC</u> CATGCAGGGAG         | Mutagenesis of HsNBR1 wt in S590A & T586A in T586A/S590A & T581A/T586A in T581A/T586A/S590A |
| HsNBR1-T586E                                               | CTGTGGATGTG <u>GAG</u> CCCTGCATGTC                  | GACATGCAGGG <u>CT</u> CCACATCCACAG                | Mutagenesis of HsNBR1 wt in T586E                                                           |
| HsNBR1-T586E/S590E                                         | GAGCCCTGCATG <u>GAA</u> CCCTCTGCCACATGAC            | GTCATGTGGCAGAGG <u>TT</u> CCATGCAGGGCTC           | Mutagenesis of HsNBR1 T586E in T586E/S590E                                                  |
| HsGSK3B-R96A                                               | GACAAGAGATTTAAGAATG <u>CAG</u> AGCTCCAGATCATG<br>AG | CTCATGATCTGGAGCTCTG <u>C</u> ATTCTTAAATCTTGT<br>C | Mutagenesis of HsGSK3B wt in R96A                                                           |
| <i>siRNA</i>                                               |                                                     |                                                   |                                                                                             |
| siRNA Hs <i>NBR1</i>                                       | AAACCUGACUUUGGCUUCCACAGAA                           | UUCUGUGGAAGCCAAAGUCAGGUUU                         | siRNA Hs <i>NBR1</i>                                                                        |
| siRNA Mm <i>Nbr1</i><br>(#MSS206945,<br>Life Technologies) | CCCUUGUGGACAGUGUGAGUCAUCA                           | UGAUGACUCACACUGUCCACAAGGG                         | siRNA Mm <i>Nbr1</i>                                                                        |
